# Supplementary material
Source: PubMed Central journal article supplement (PMC5041200)

# Supplementary Figure 1

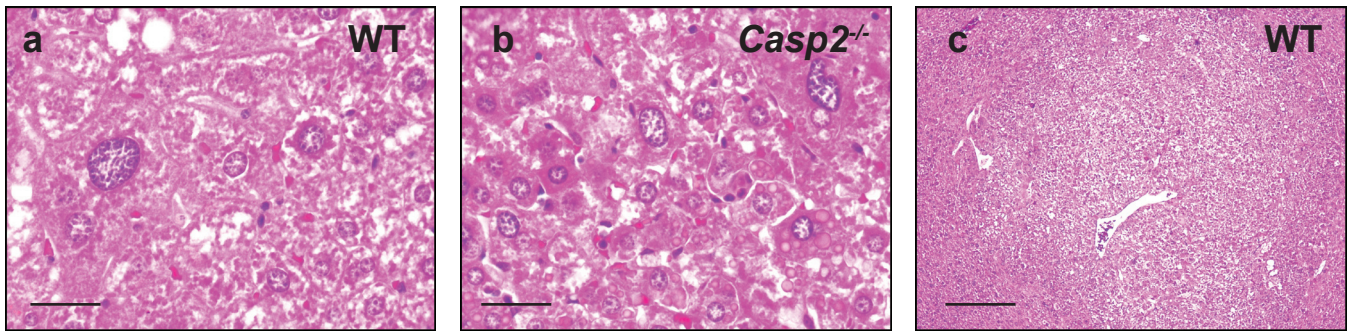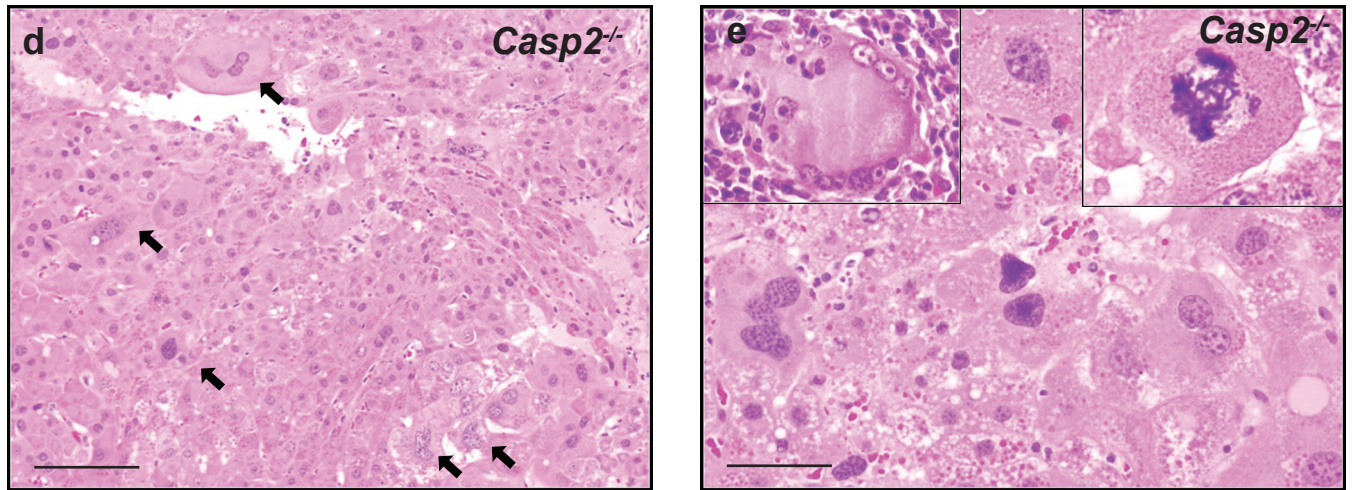

f

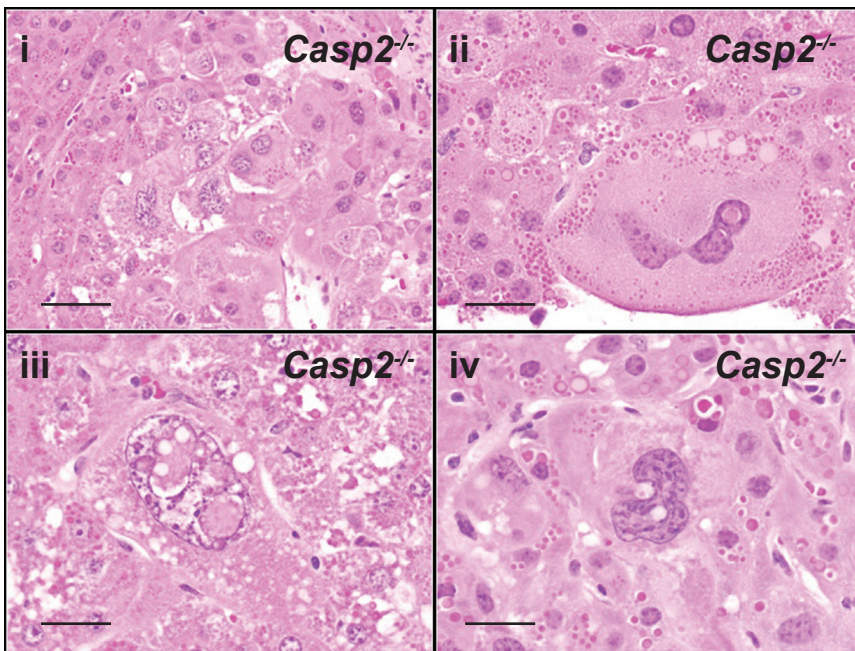

Supplement: cdd201681x2.pdf [file cdd201681x2.pdf]

# Supplementary figure 2

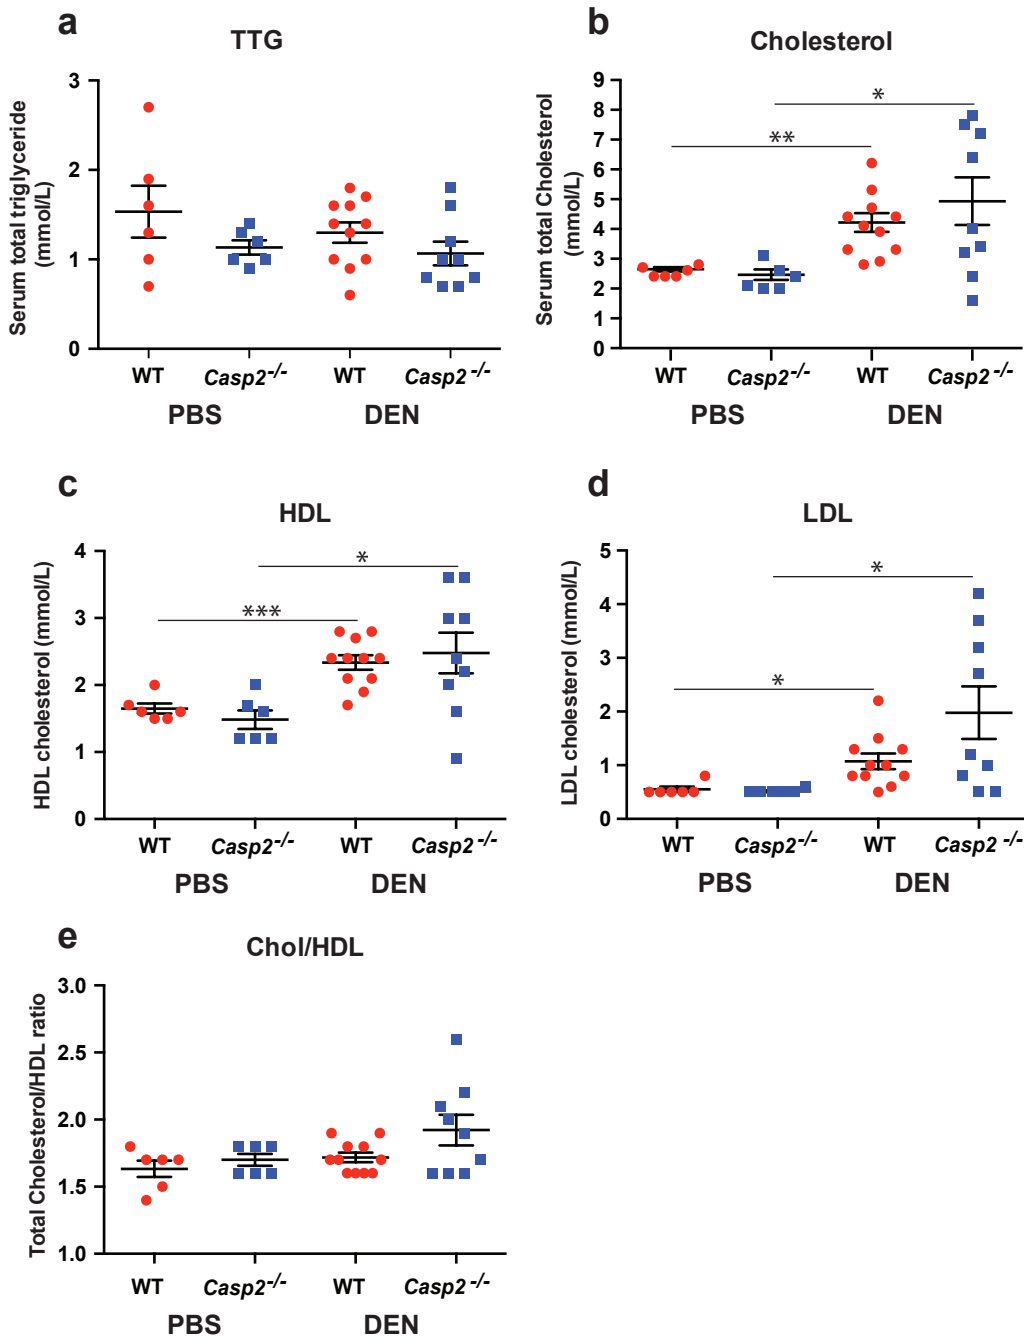

Supplement: cdd201681x3.pdf [file cdd201681x3.pdf]

### Supplementary figure 3

#### Cleaved caspase-3

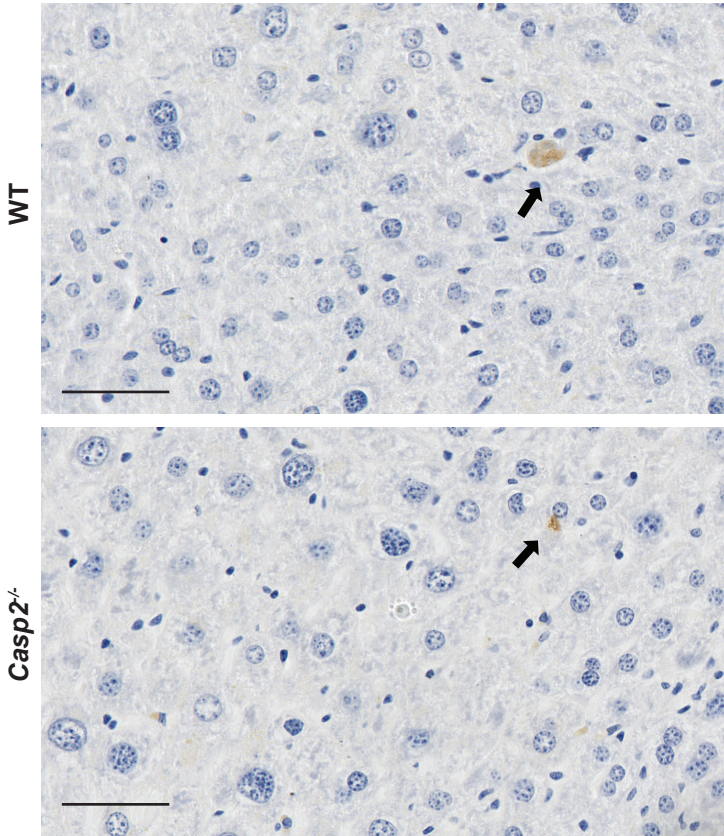

Supplement: cdd201681x4.pdf [file cdd201681x4.pdf]

# Supplementary figure 4

a

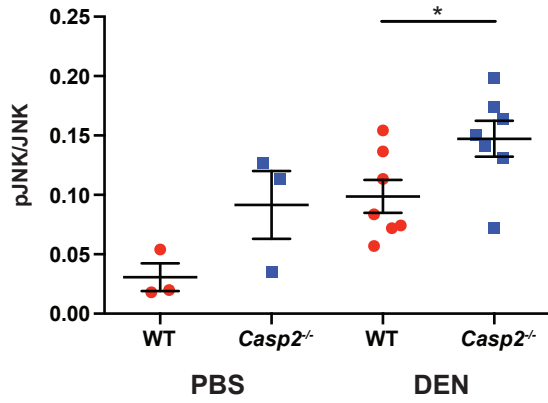

b

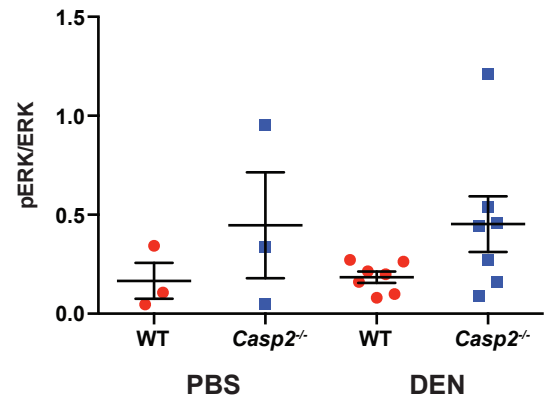

c

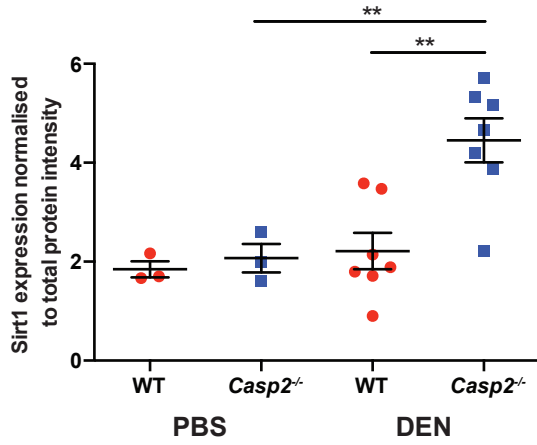

d

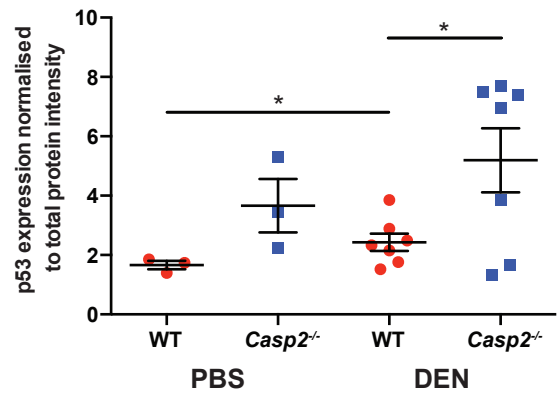

e

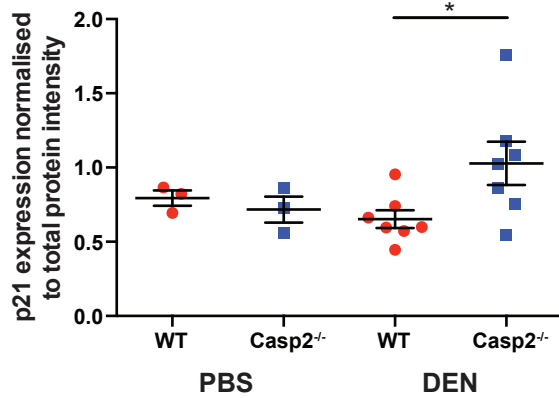

Supplement: cdd201681x5.pdf [file cdd201681x5.pdf]

# Supplementary figure 5

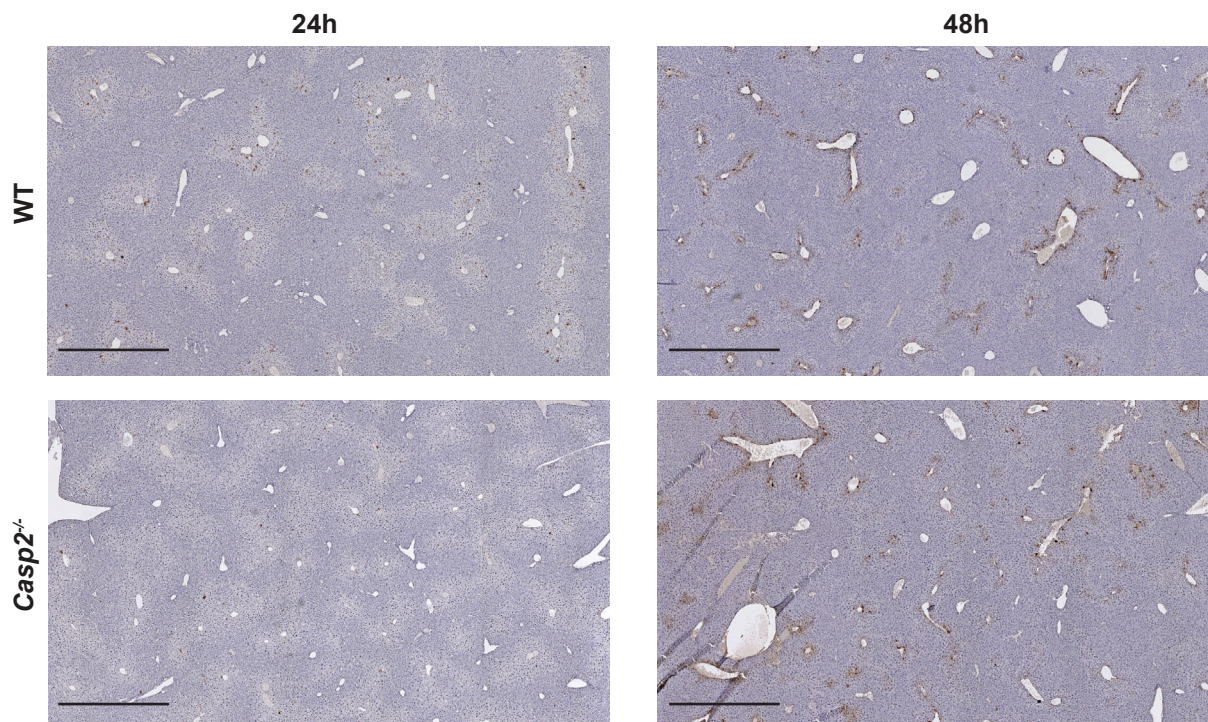

Supplement: cdd201681x6.pdf [file cdd201681x6.pdf]

## Supplementary figure 6

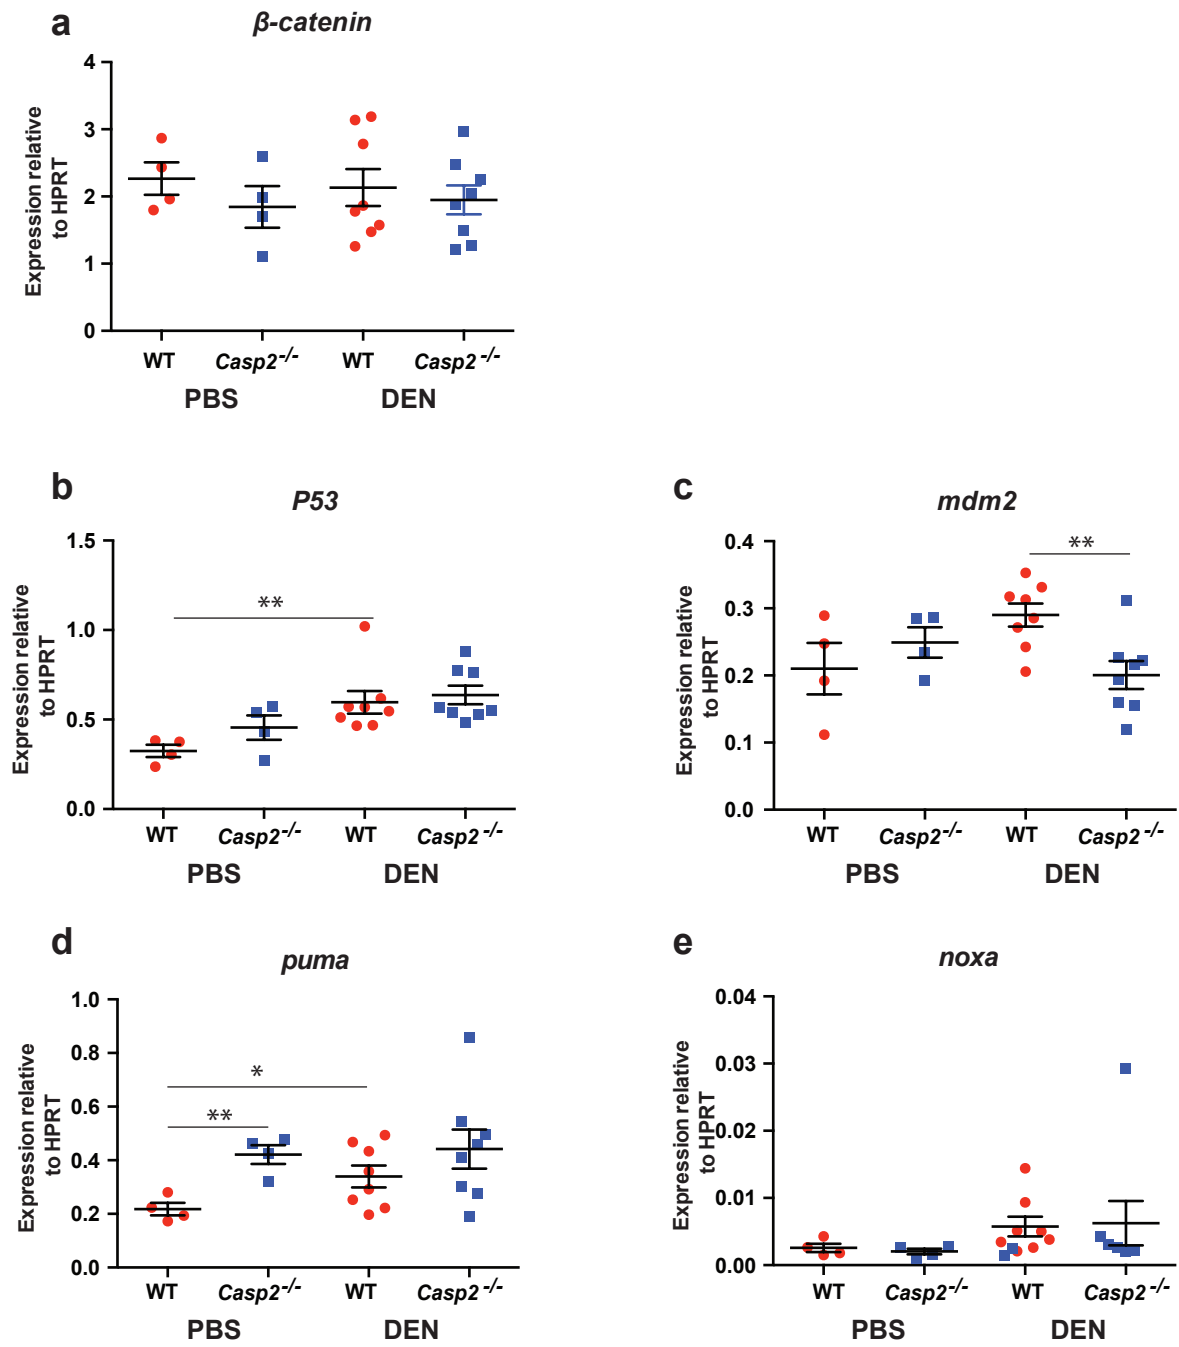

Supplement: cdd201681x7.pdf [file cdd201681x7.pdf]

## Supplementary figure 7

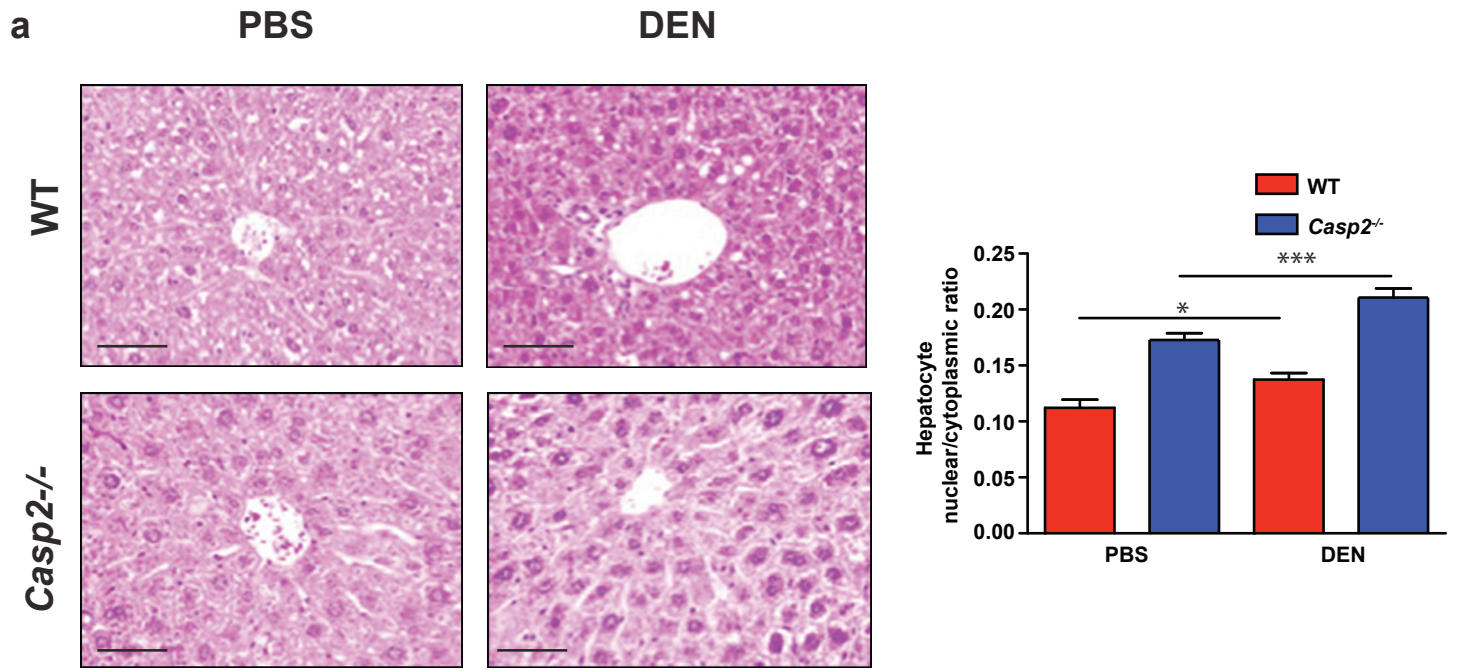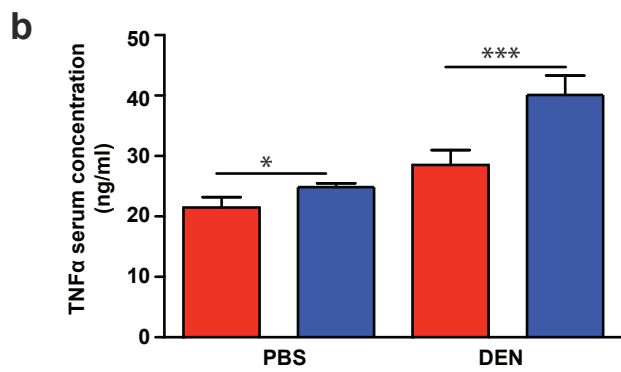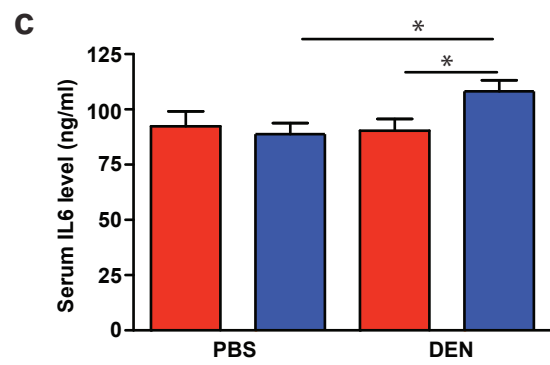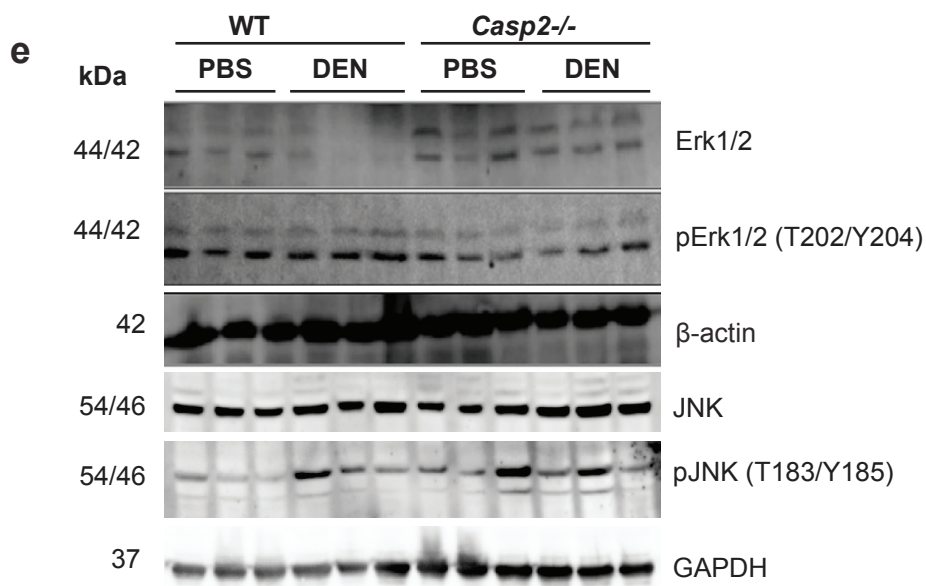

Supplement: cdd201681x8.pdf [file cdd201681x8.pdf]
